# Supplementary material
Source: Springer Nature journal article supplement (https://www.springermedizin.de/resource/supplementary/13024_2012_348_MOESM5_ESM.pdf/9643760)

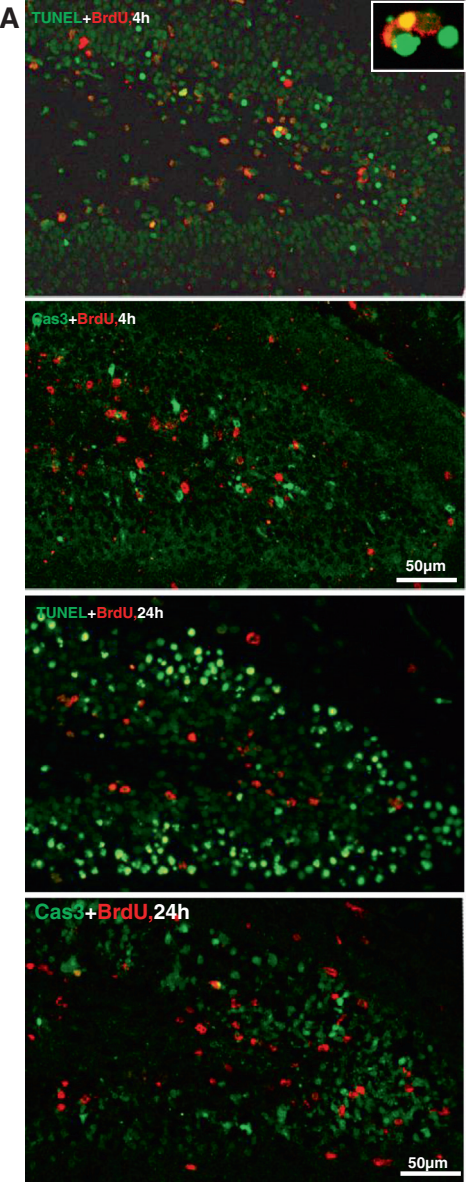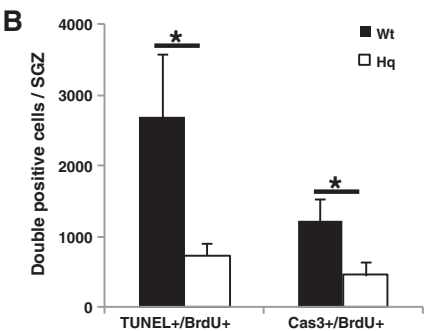

Supplement: MOESM5 [file 9643760]
